# Supplementary material for: A Small Molecule Targeting the Intracellular Tyrosine Kinase Domain of ROR1 (KAN0441571C) Induced Significant Apoptosis of Non-Small Cell Lung Cancer (NSCLC) Cells
Source: MDPI journal article supplement (doi:10.3390/pharmaceutics15041148), 2023-04-05
Supplement: s1 [file s1]

# Supplementary Data

**Table S1.** Relation between ROR1 expression and subgroups of lung cancer patients.

| <b>Histology</b>                                              | <b>ROR1 expression *</b> |          |          | <b>P value</b> |
|---------------------------------------------------------------|--------------------------|----------|----------|----------------|
|                                                               | <b>0</b>                 | <b>1</b> | <b>2</b> |                |
| <b>Non-Squamous low-differentiated adenocarcinoma (n=157)</b> | 21 (13) **               | 60 (38)  | 76 (48)  | 0,0001         |
| <b>Squamous (n=106)</b>                                       | 46 (43)                  | 32 (30)  | 28 (26)  |                |
| <b>Neuroendocrine (mainly carcinoids) (n=24)</b>              | 19 (80)                  | 2 (8)    | 3 (12)   |                |

\* ROR1 expression was scored as: 0: negative; 1: weak; 2: strong

\*\* Figures within brackets indicate percent

**Table S2.** ROR1 expression by pathological stage (7<sup>th</sup> TNM).

| Pathological stage | ROR1 expression intensity * |         |         |
|--------------------|-----------------------------|---------|---------|
|                    | 0                           | 1       | 2       |
| IA n= (118)        | 28 (24) **                  | 45 (38) | 45 (38) |
| IB n= (89)         | 21 (24)                     | 27 (30) | 41 (46) |
| II n= (40)         | 14 (35)                     | 17 (42) | 9 (22)  |
| III-IV (n=9)       | 4 (25)                      | 3 (19)  | 9 (56)  |

\* ROR1 expression scored as: 0: negative; 1: weak; 2: strong. \*\* Figures within brackets indicate percent.

**Table S3.** Characteristics of the ROR1 positive lung cancer cell lines.

| Cell lines | Histology               | Doubling time (hours) | EGFR mutation                      | K-RAS mutation | P53 mutation |
|------------|-------------------------|-----------------------|------------------------------------|----------------|--------------|
| NCI-H1975  | adenocarcinoma          | 53                    | Mutated L858R/T790M                | WT *           | +            |
| NCI-H23    | adenocarcinoma          | 33                    | WT                                 | +              | +            |
| NCI-HCC827 | adenocarcinoma          | 44                    | Mutated E746-A750 deletion (Del19) | WT             | N/A **       |
| A549       | adenocarcinoma          | 23.8                  | WT                                 | +              | WT           |
| NCI-H1299  | squamous cell carcinoma | 23.1                  | WT                                 | WT             | +            |

\* Wild type, \*\* not available.

**Table S4.** Clinical characteristics of adenocarcinoma NSCLC patients (n=139) in relation to ROR1 expression.

| <b>Patients characteristics</b>            | <b>ROR1 <sup>-</sup> patients (n=16)</b> | <b>ROR1 <sup>+</sup> patients (n=123)</b> | <b>P value</b> |
|--------------------------------------------|------------------------------------------|-------------------------------------------|----------------|
| <b><u>Age (y), Median</u></b>              | 69 (56-72)                               | 65 (56-72)                                | 0.5            |
| <b><u>Gender</u></b>                       |                                          |                                           |                |
| Male                                       | 4 (3) *                                  | 59 (42)                                   | 0.07           |
| Female                                     | 12 (9)                                   | 64 (46)                                   |                |
| <b><u>Smoking status</u></b>               |                                          |                                           |                |
| Current                                    |                                          | 54 (39)                                   | 0.6            |
| Former                                     | 9 (6)                                    | 38 (27)                                   |                |
| Never                                      | 5 (4)                                    | 18 (13)                                   |                |
| Missing                                    | 1 (1)                                    | 13 (9)                                    |                |
| <b><u>Type of surgery</u></b>              |                                          |                                           |                |
| Lobectomy                                  | 12 (9)                                   | 98 (70)                                   | 0.6            |
| Pulmectomy                                 | 4 (3)                                    | 26 (18)                                   |                |
| <b><u>P Stage (7<sup>th</sup> TNM)</u></b> |                                          |                                           |                |
| IA                                         | 10 (7)                                   | 62 (45)                                   | 0.4            |
| IB                                         | 2 (1)                                    | 38 (27)                                   |                |
| II                                         | 3 (2)                                    | 17 (12)                                   |                |
| III-IV                                     | 1 (1)                                    | 6 (4)                                     |                |
| <b><u>Histologic Grading</u></b>           |                                          |                                           |                |
| G1                                         | 3 (2)                                    | 46 (35)                                   | 0.3            |
| G2                                         | 6 (5)                                    | 35 (26)                                   |                |
| G3                                         | 6 (5)                                    | 36 (27)                                   |                |
| <b><u>P53 Expression</u></b>               |                                          |                                           |                |
| Negative                                   | 7 (5)                                    | 88 (63)                                   | 0.03           |
| Positive                                   | 9 (6)                                    | 35 (25)                                   |                |

\* Figures within brackets indicate percent.

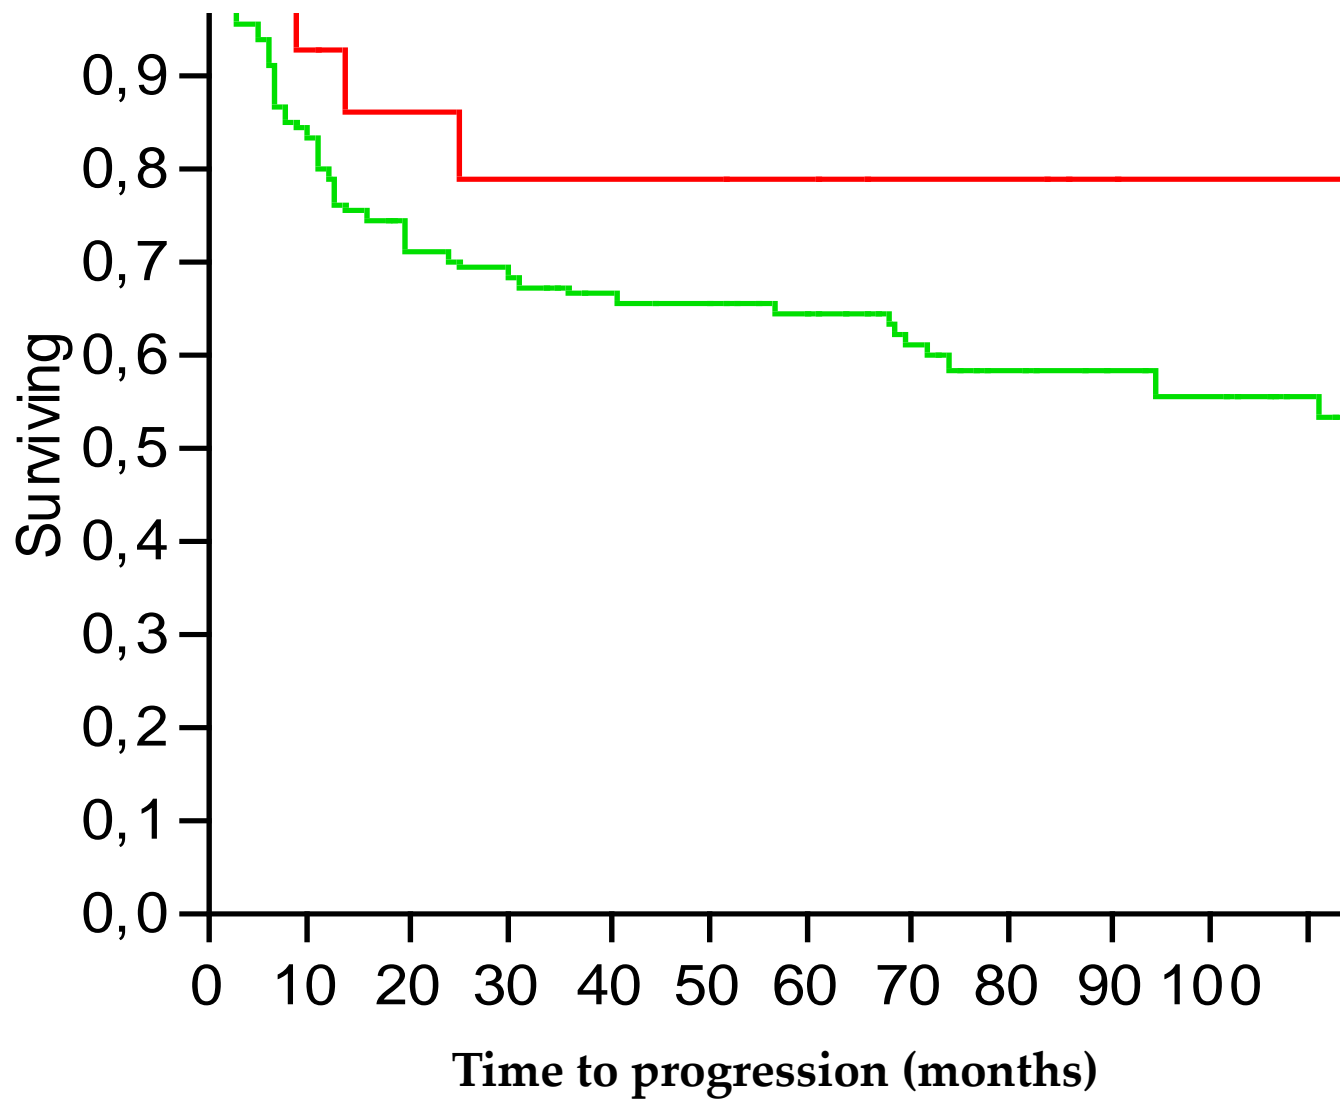

**Fig S1:** Time to progression (TTP) in non-squamous NSCLC patients with no ROR1 expression (red line) (n=16) compared to those positive for ROR1 (green line) (n=123) (p=0.09).

**Fig S2. Immunofluorescent staining of untreated lung cancer cell lines using anti-ROR1 antibodies (20X).** Lung cancer cells were cultured on sterile 8 wells glass slide for 24 h, fixed, blocked in PBS containing BSA and then incubated with an anti-ROR1 antibody for 24 h at 4°C and finally treated with Alexa Flour 488-conjugated goat anti-mouse IgG for 1 h. After washing, the cell nuclei were stained with mounting media containing DAPI. A Zeiss Axioplan2 fluorescence microscope was used.

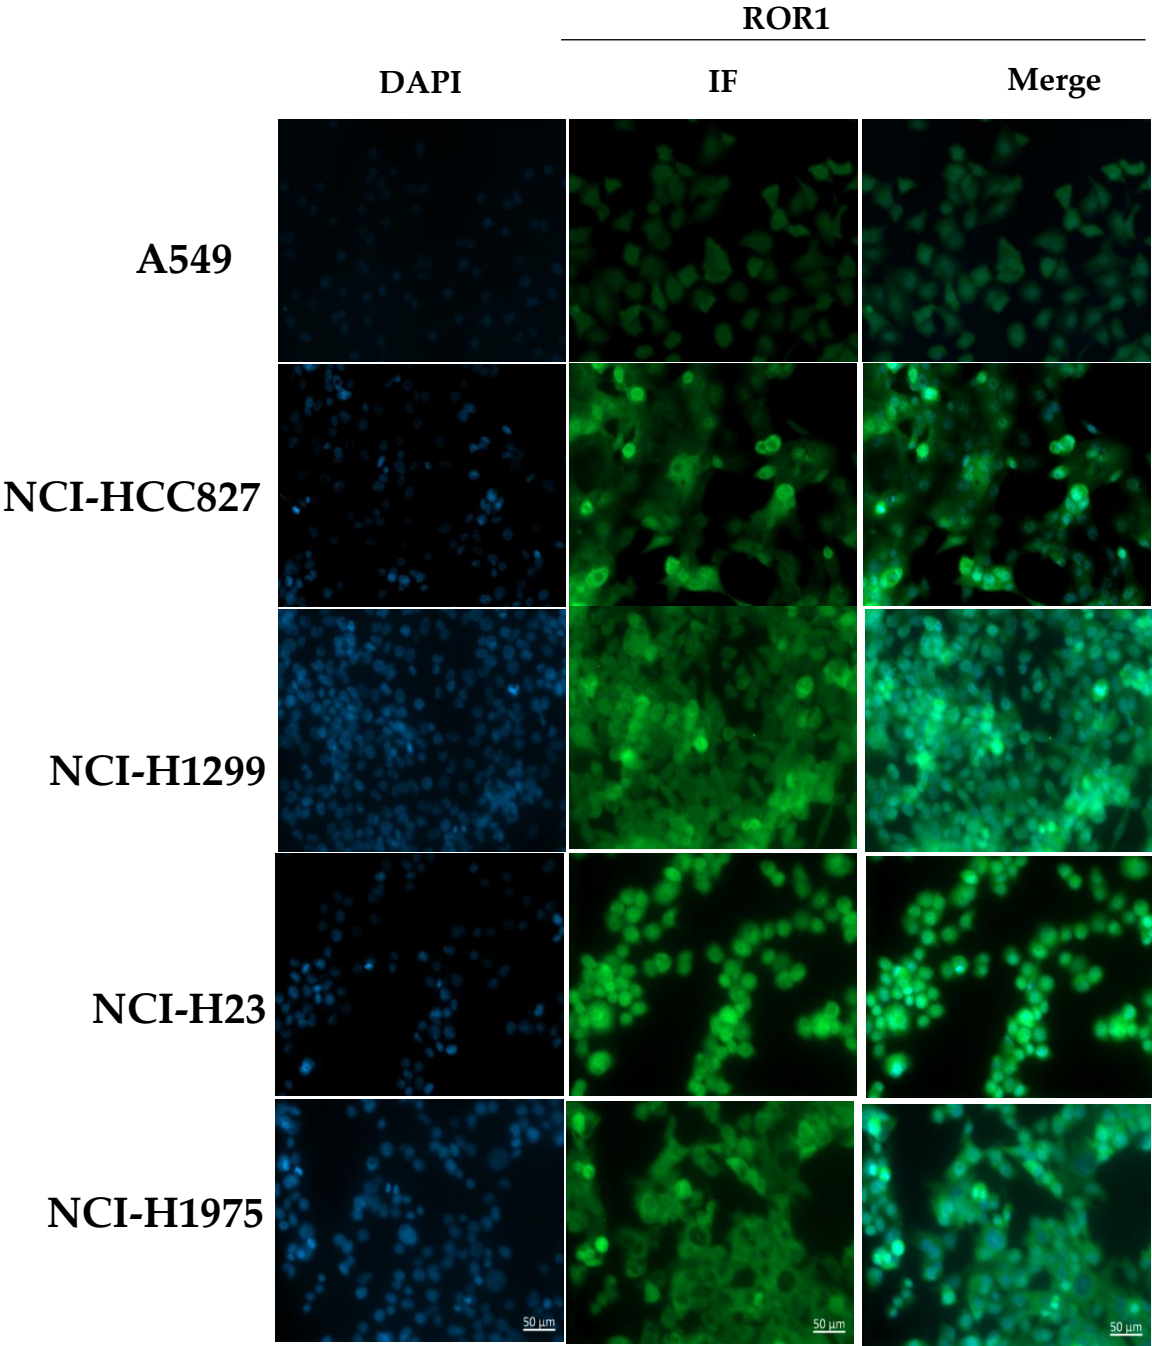



**Fig S3. Migration of lung cancer cell lines (NCI-H1299 and NCI-H1975) in the wound scratch healing assay.** Migration of lung cancer cell lines was inhibited after treatment with 50-1000 nM of KAN0441571C for 0, 24 and 72 h.

**NCI-H1299**

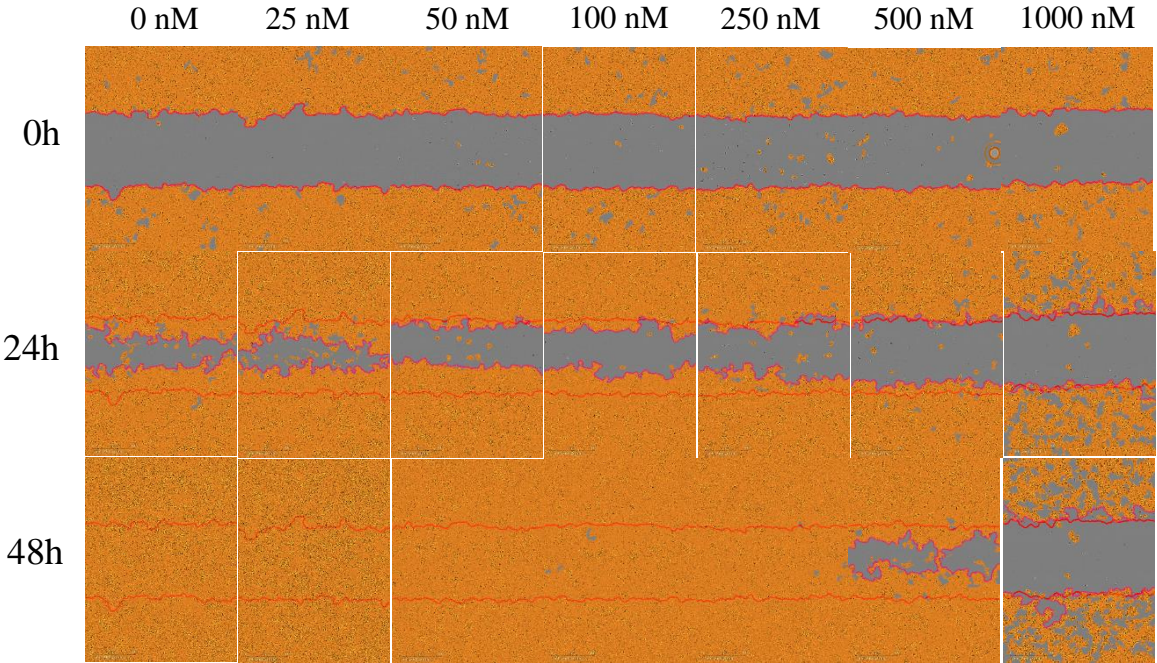

**NCI-H1975**

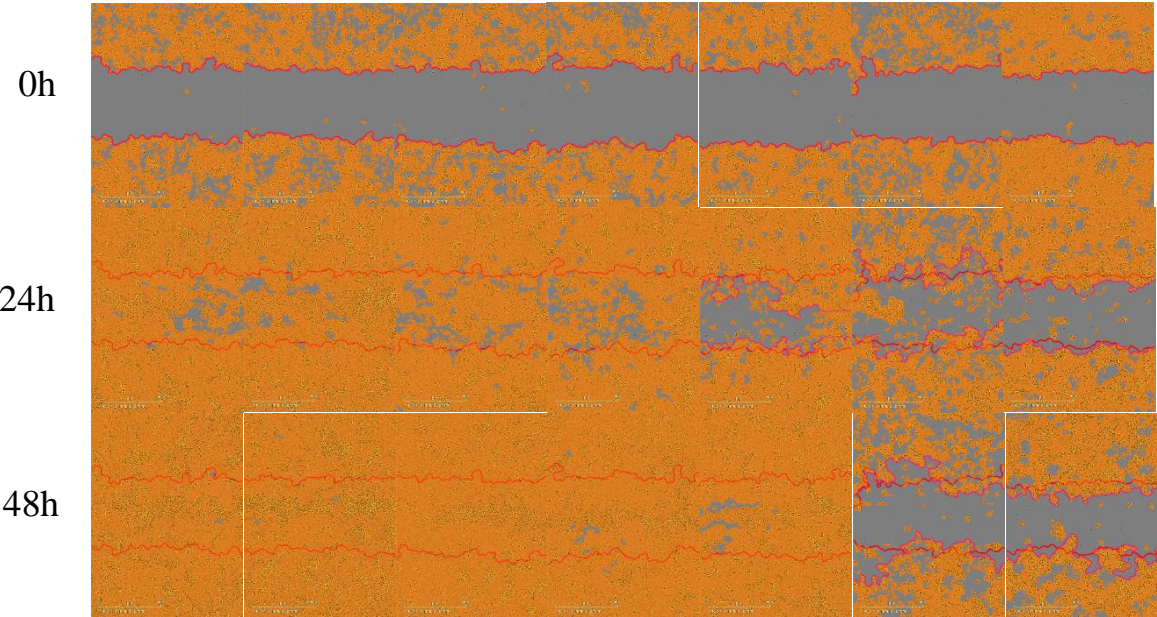



**Figure S4. Cell cycle profiles of A549 lung cancer cells treated with KAN0441571C.** KAN0441571C induced reduction of S phase cells and accumulation in the G2 phase with a simultaneous increased cell death. Representative histograms (A) and quantifications (B) of 3 independent experiments.

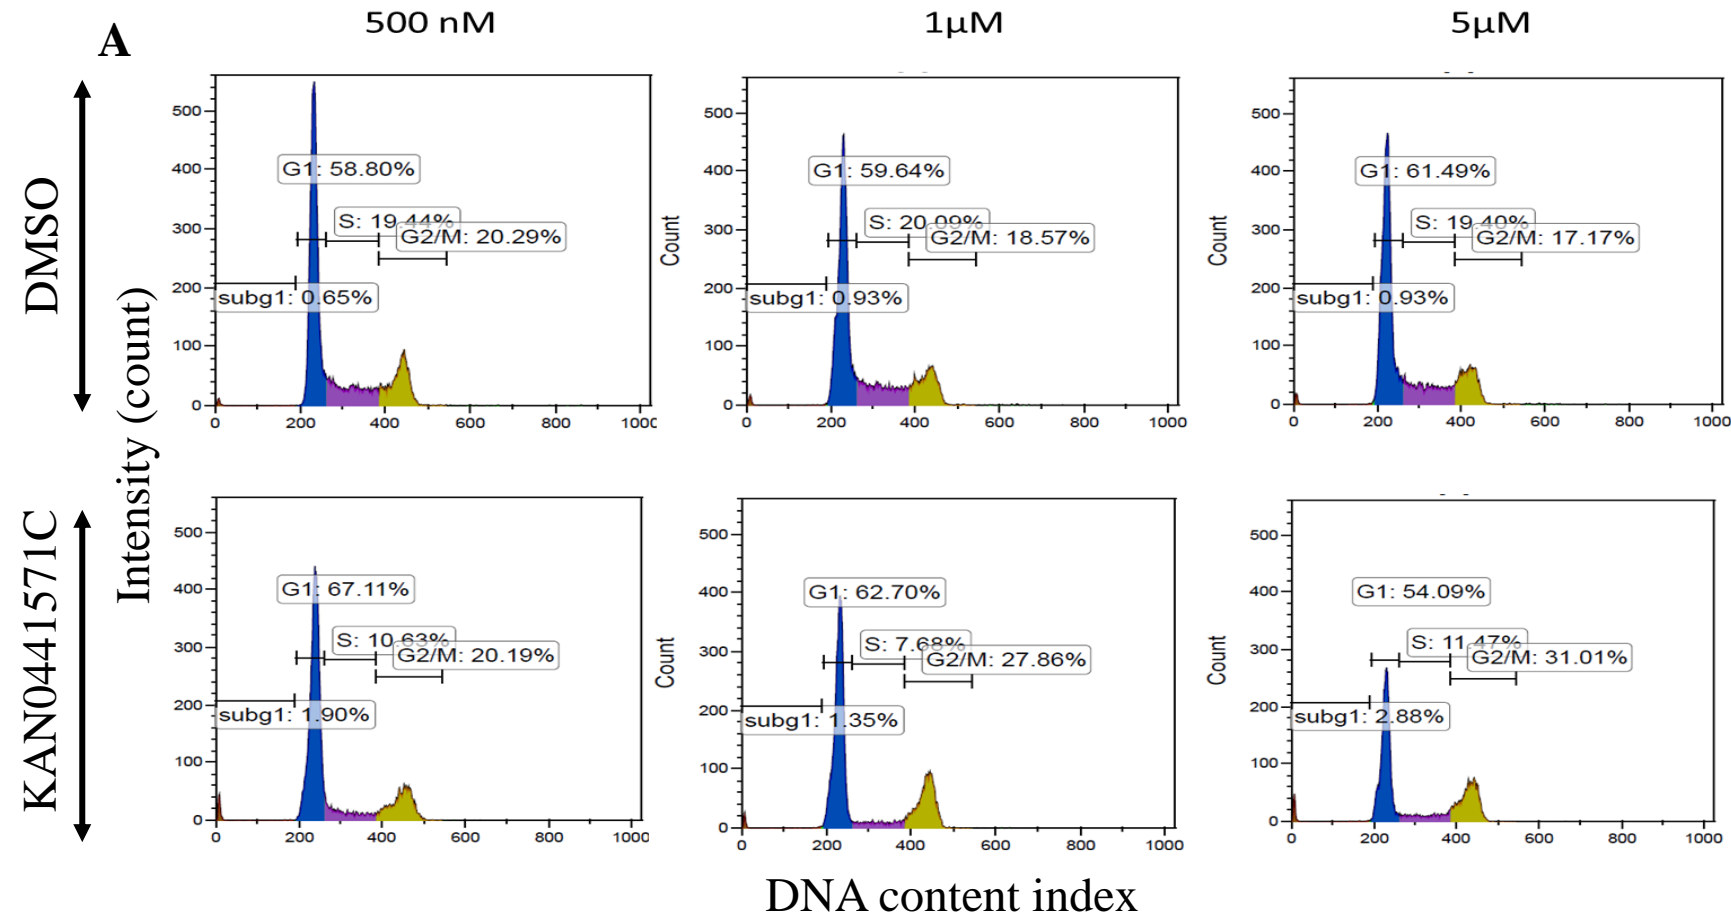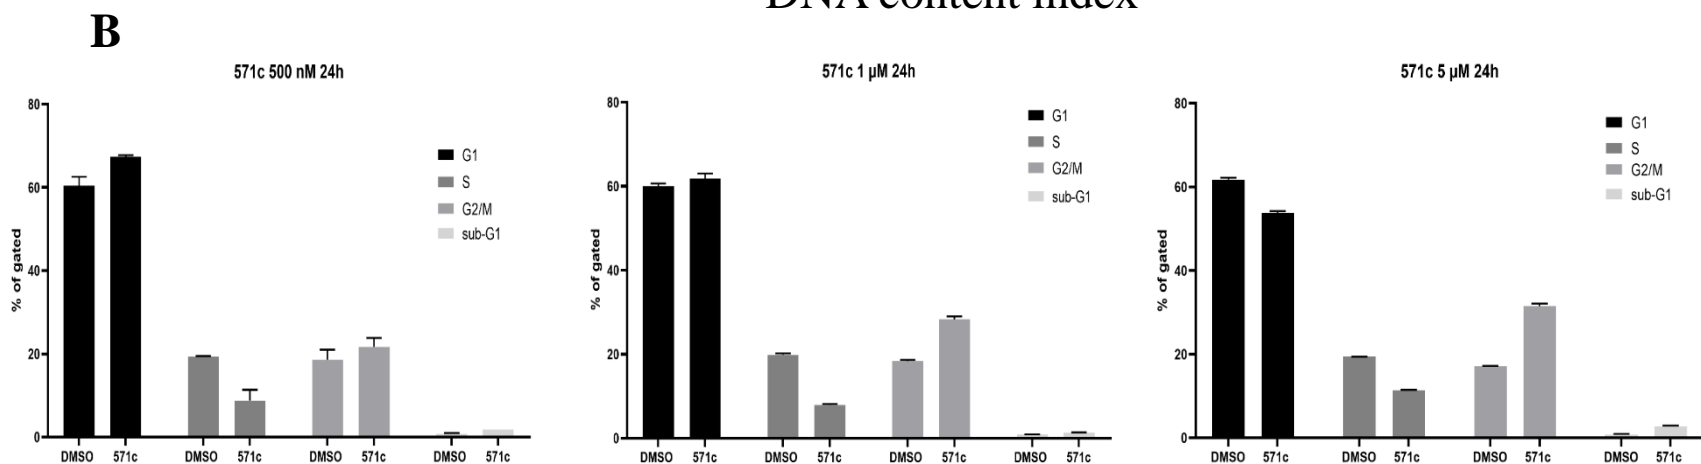

**Figure S5. Effect of KAN0441571C on ROR1 associated signaling molecules (Western blot) (4 h incubation) in the lung cancer cell line NCI-H23. ROR1, EGFR, SRC, AKT, PI3K110 $\delta$ , mTOR, and CREB were dephosphorylated. One of three representative experiments is shown.**

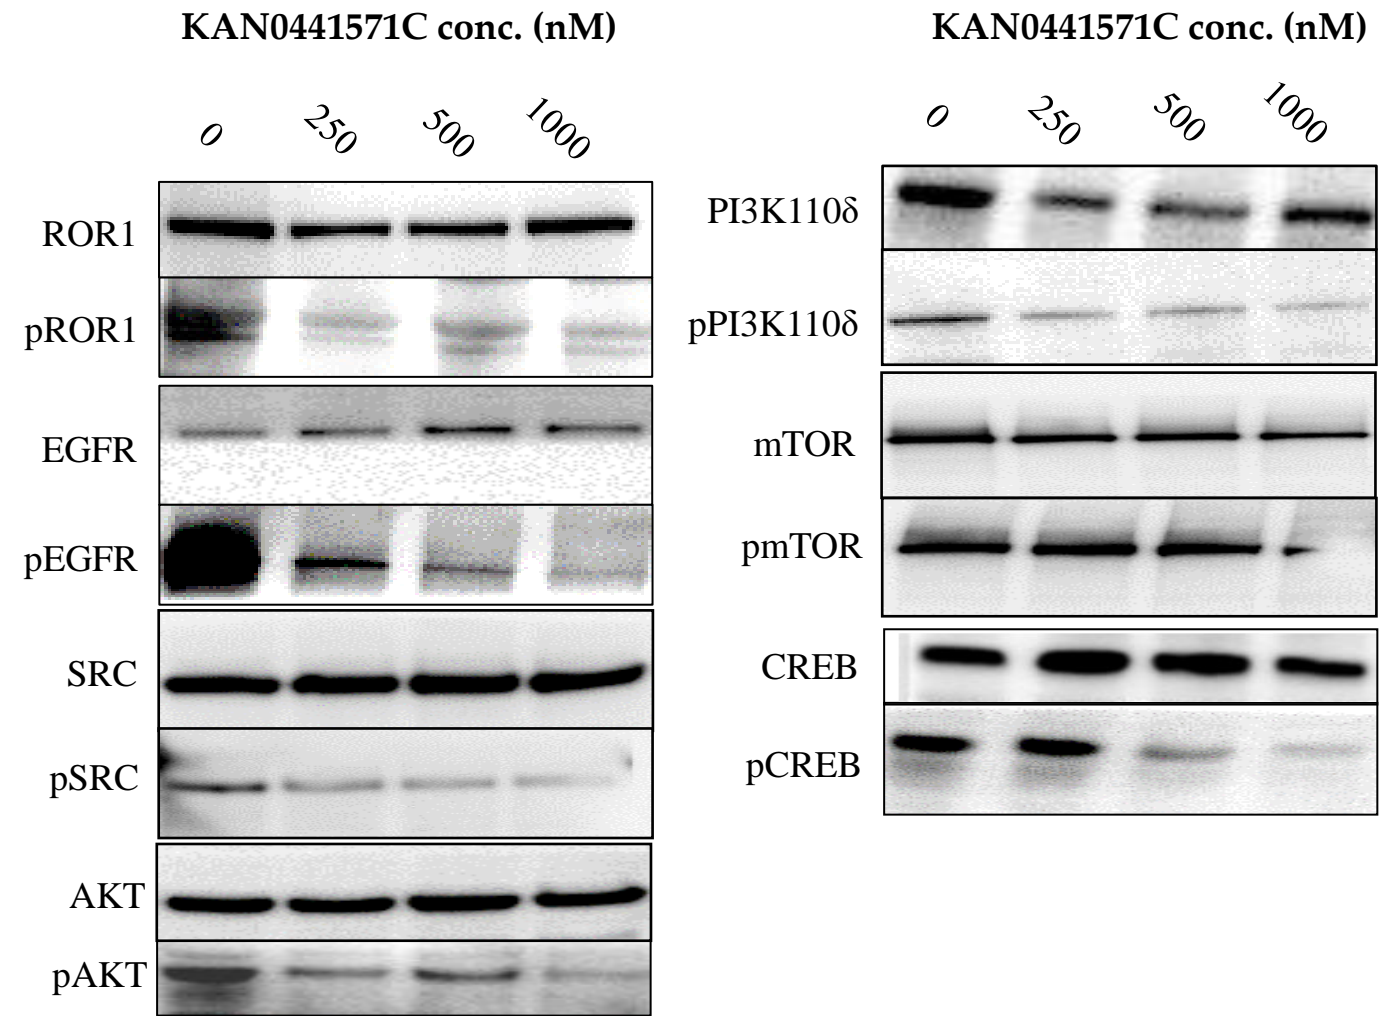

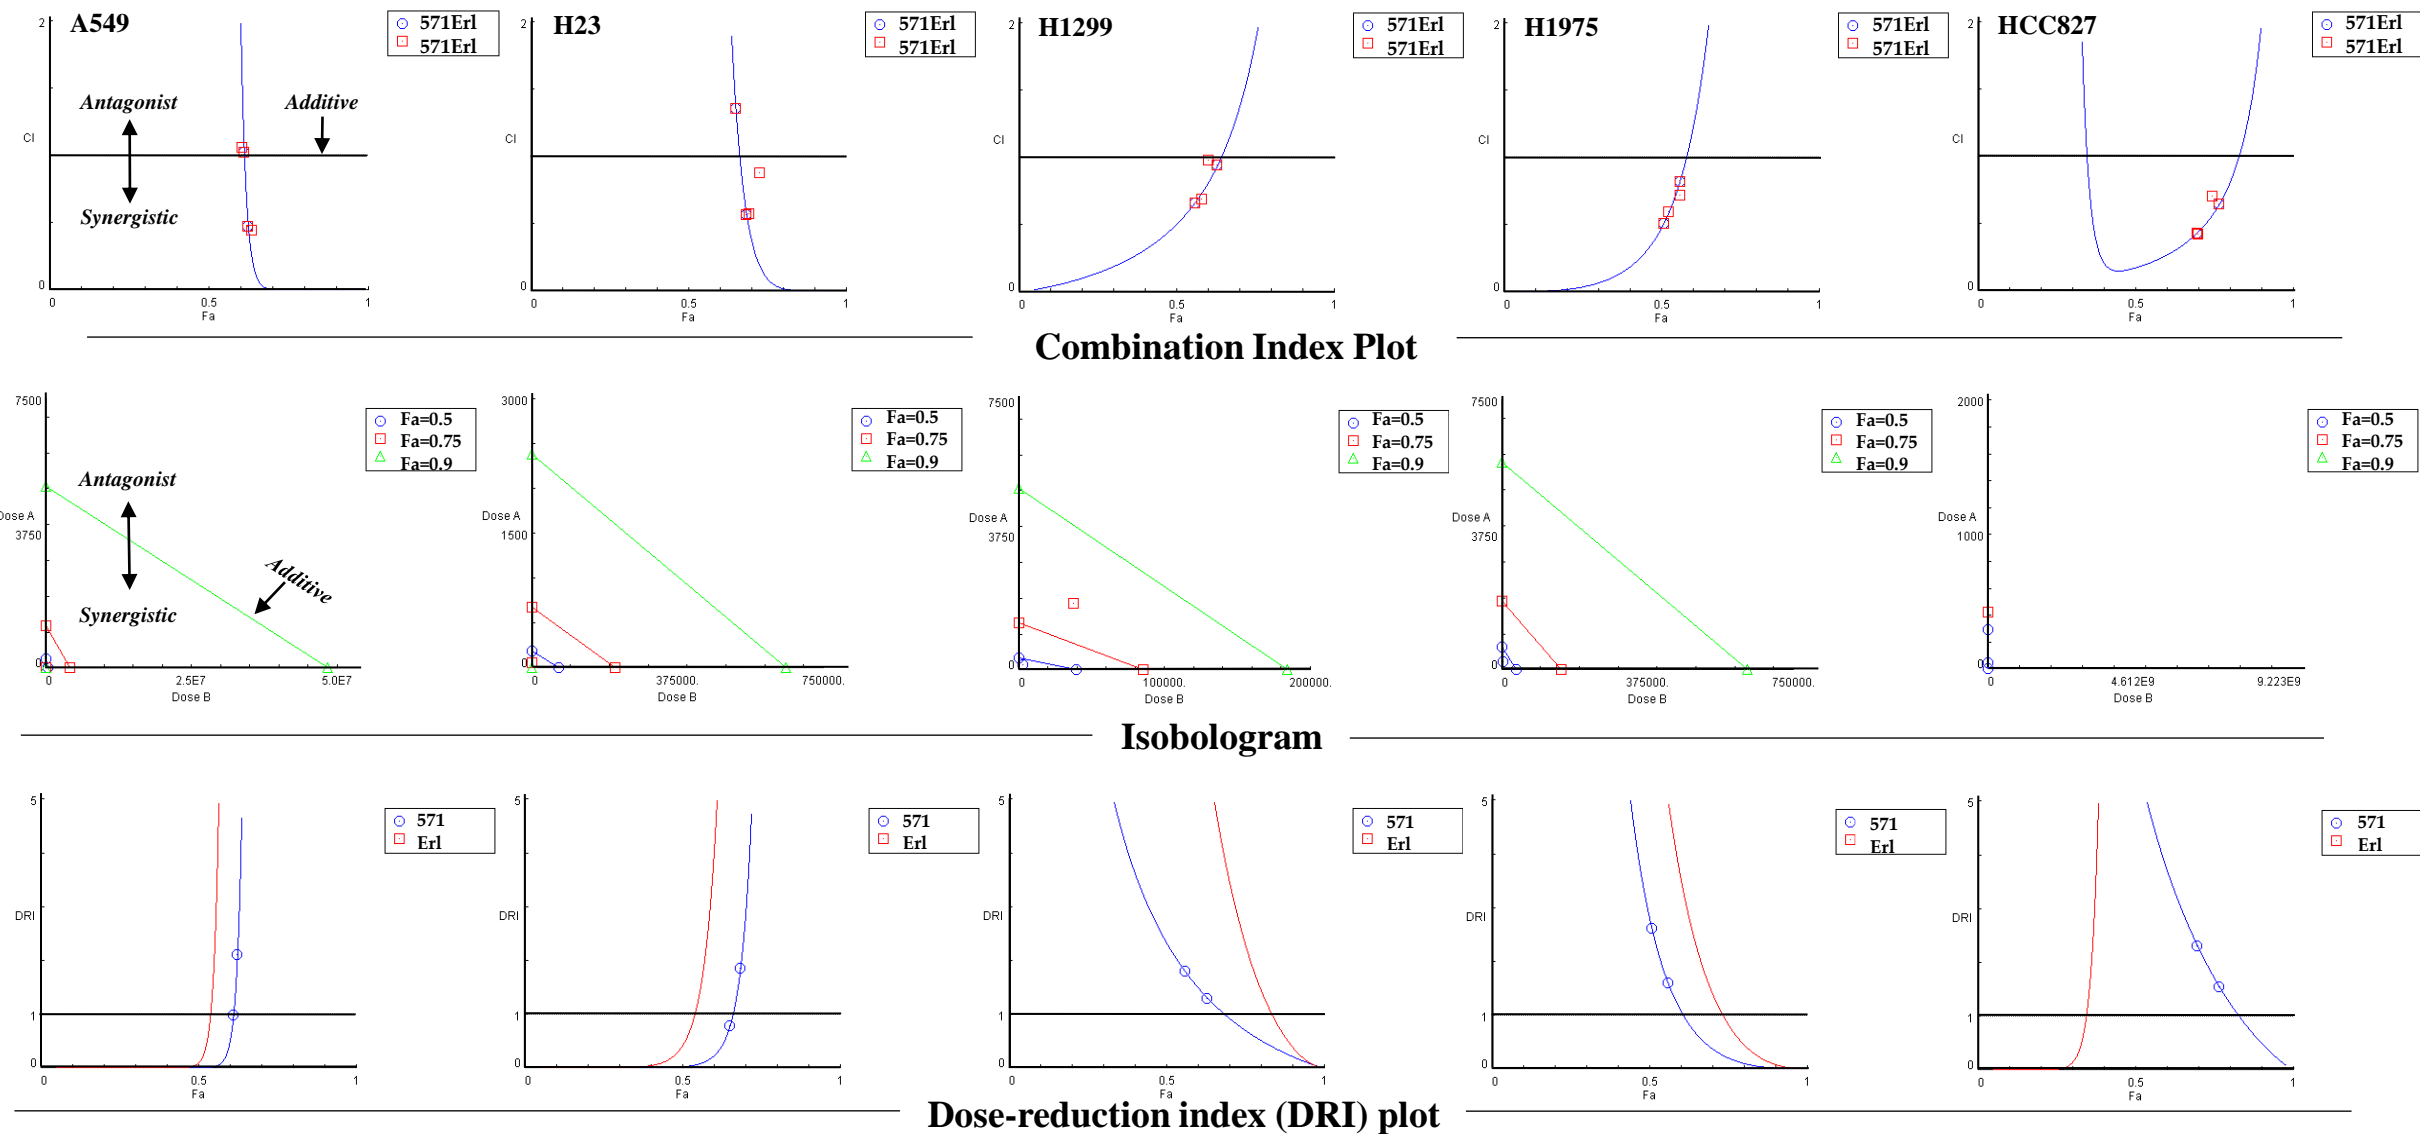

**Figure S6A. Apoptosis (Annexin V/PI) in 5 lung cancer cell lines incubated with a combination of KAN0441571C (250 nM) with erlotinib (5000-10000 nM).** For each combination, data are shown as combination index plot (CI), isobologram and dose reduction index (DRI). Combination Index (CI) Plot (Fa-CI plot): Values across Fa in lung cancer cells, where Fa is the % of cell death. CI < 1 synergistic effect; CI = 1 additive effect; CI > 1 antagonistic effect. (Chou/Talalay) method).

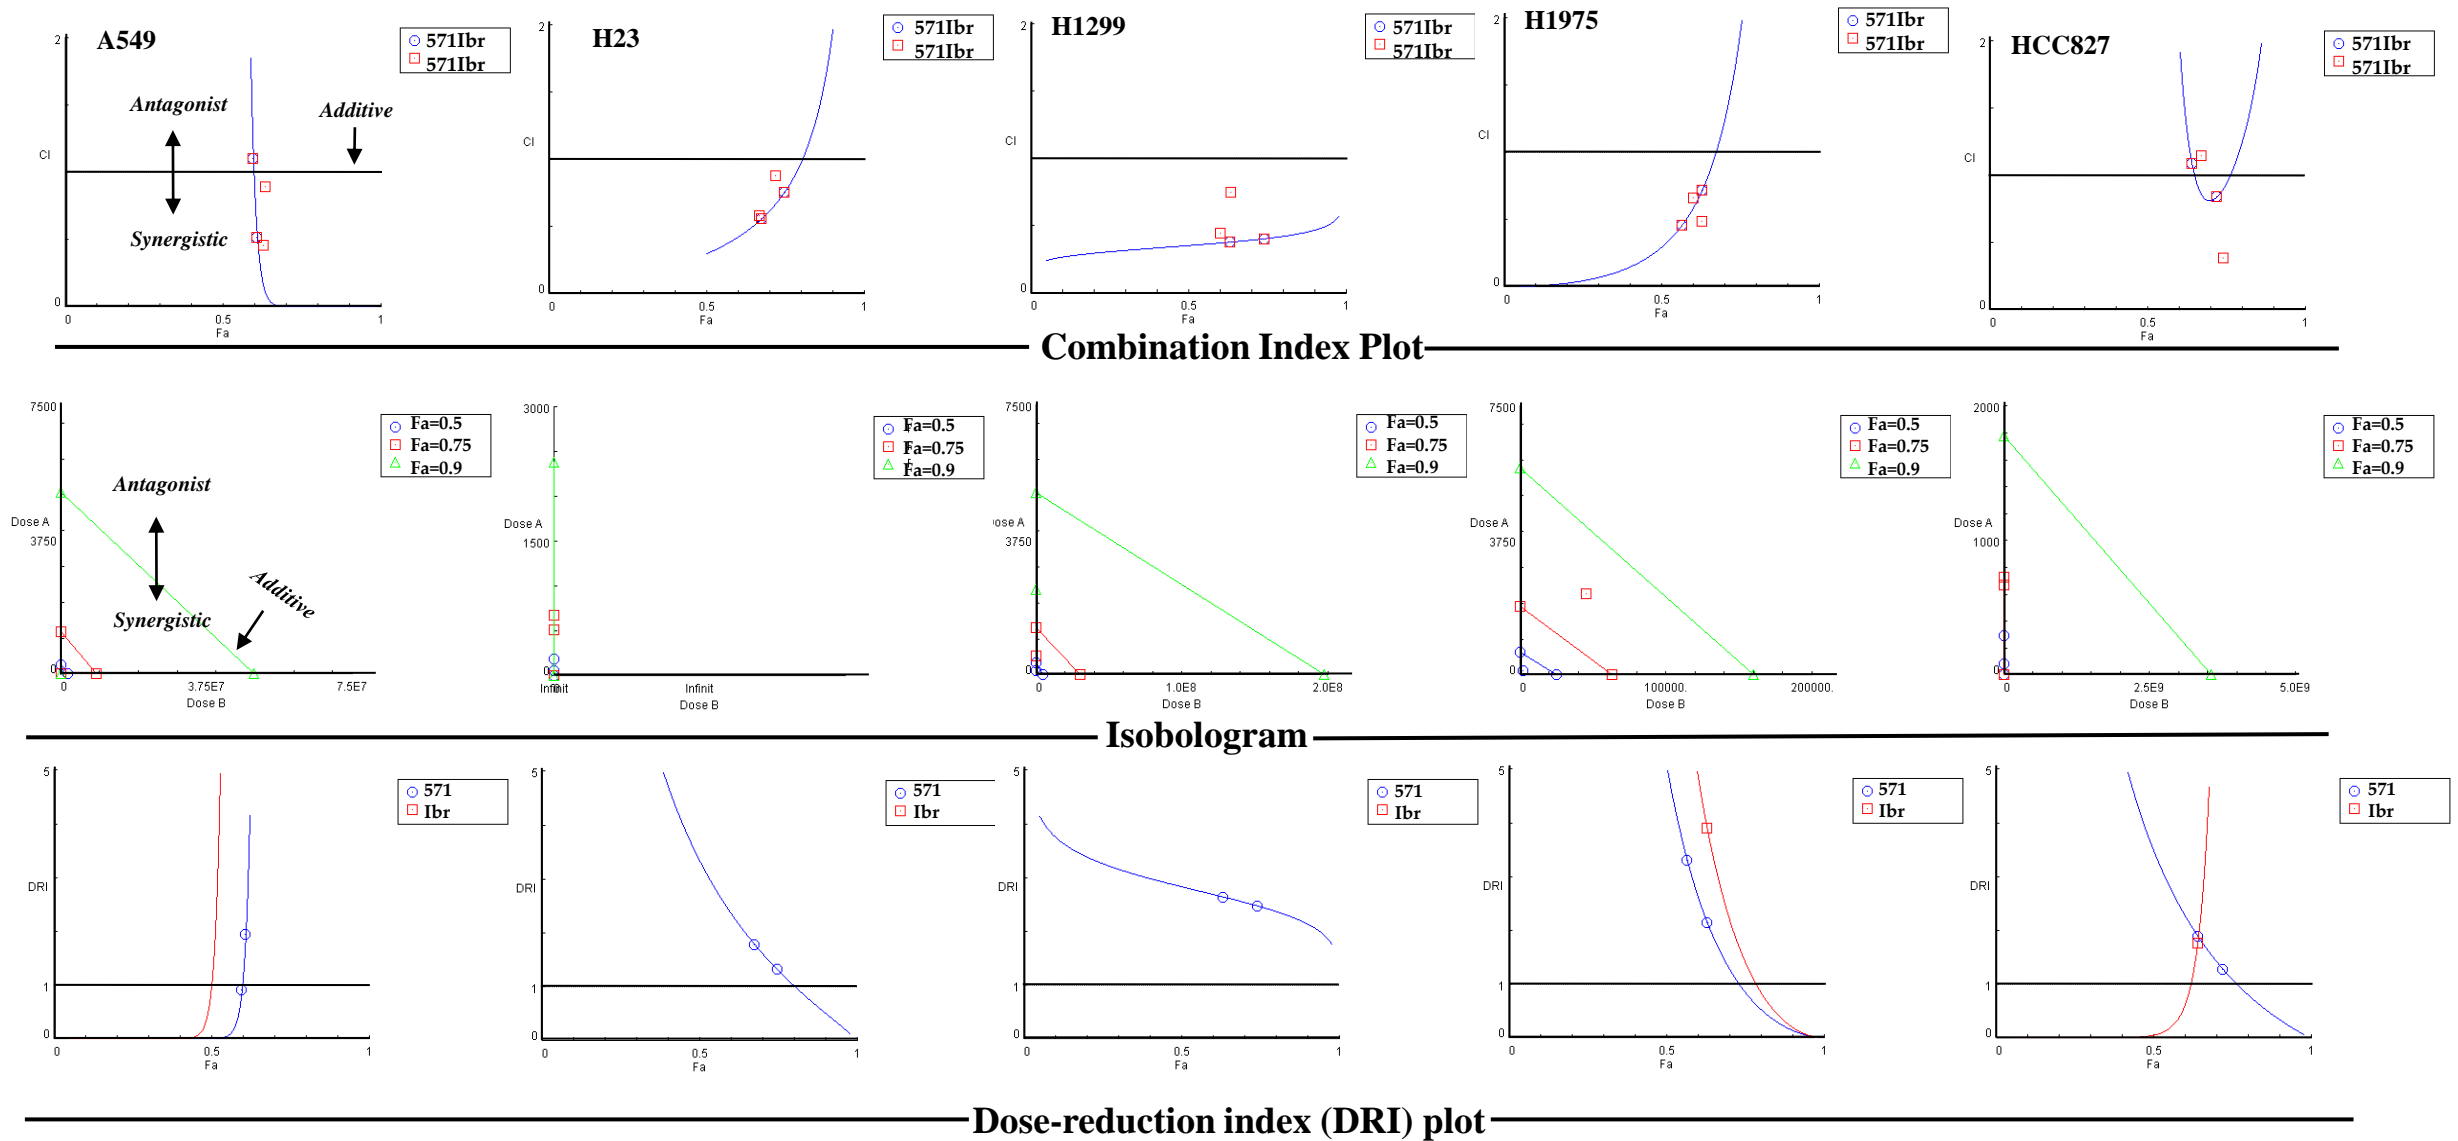

**Figure S6B. Apoptosis (Annexin V/PI) in 5 lung cancer cell lines incubated with a combination of KAN0441571C (250nM) with ibrutinib (5000-10000nM).** For each combination, data are shown as combination index plot (CI), isobologram and does reduction index (DRI). Combination Index (CI) plot (Fa-CI-plot): Values across Fa in lung cancer cell lines, where Fa is the % of cell death. CI<1 synergistic effect; CI=1 additive effect; CI > 1 antagonistic effect. (Chou/Talalay method).
